# Supplementary material
Source: MDPI journal article supplement (https://www.mdpi.com/1999-4907/11/11/1195)
Supplement: s1 [file s1]

## Supplementary Materials

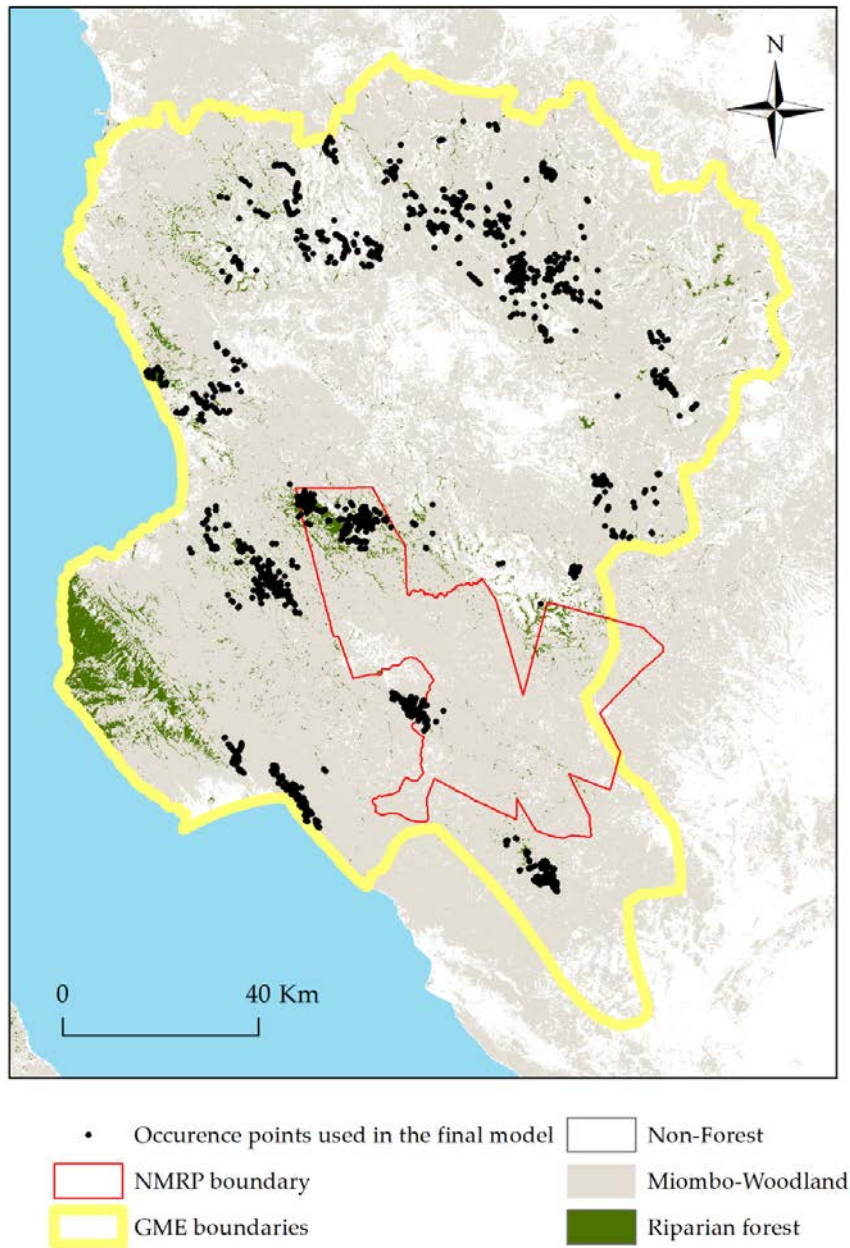

**Figure S1:** Locations of the occurrence points used in the final habitat suitability model

**Table S1:** Predictive accuracy and standard deviation (SD) of the 5 replicates for the 3 algorithms.

|               | Individual runs |       |       |       | Ensemble |       |
|---------------|-----------------|-------|-------|-------|----------|-------|
|               | TSS             | SD    | AUC   | SD    | TSS      | ROC   |
| <b>RF</b>     | 0.791           | 0.009 | 0.948 | 0.003 | 0.908    | 0.984 |
| <b>GBM</b>    | 0.797           | 0.008 | 0.950 | 0.003 | 0.799    | 0.953 |
| <b>Maxent</b> | 0.787           | 0.009 | 0.945 | 0.003 | 0.79     | 0.949 |

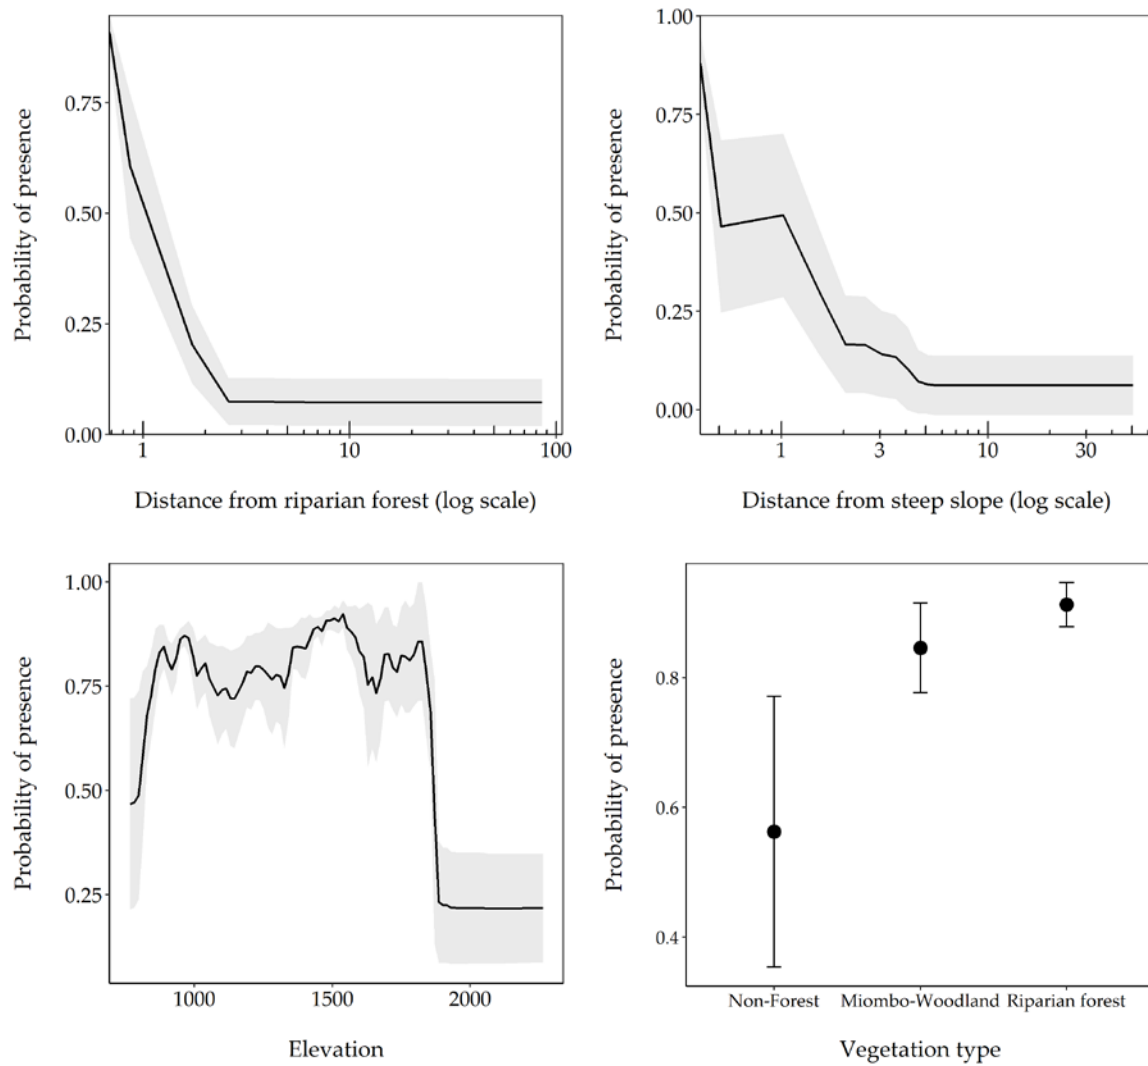

**Figure S2:** Response curves derived by the ensemble prediction. The plots show the mean response (dark line and dark points) and the standard deviation (error bars and grey ribbon) of the 5 replicates of the 3 algorithms. The curves display how the predicted probability of presence vary in function of each environmental variable. These response curves do not account for interactions between variables.

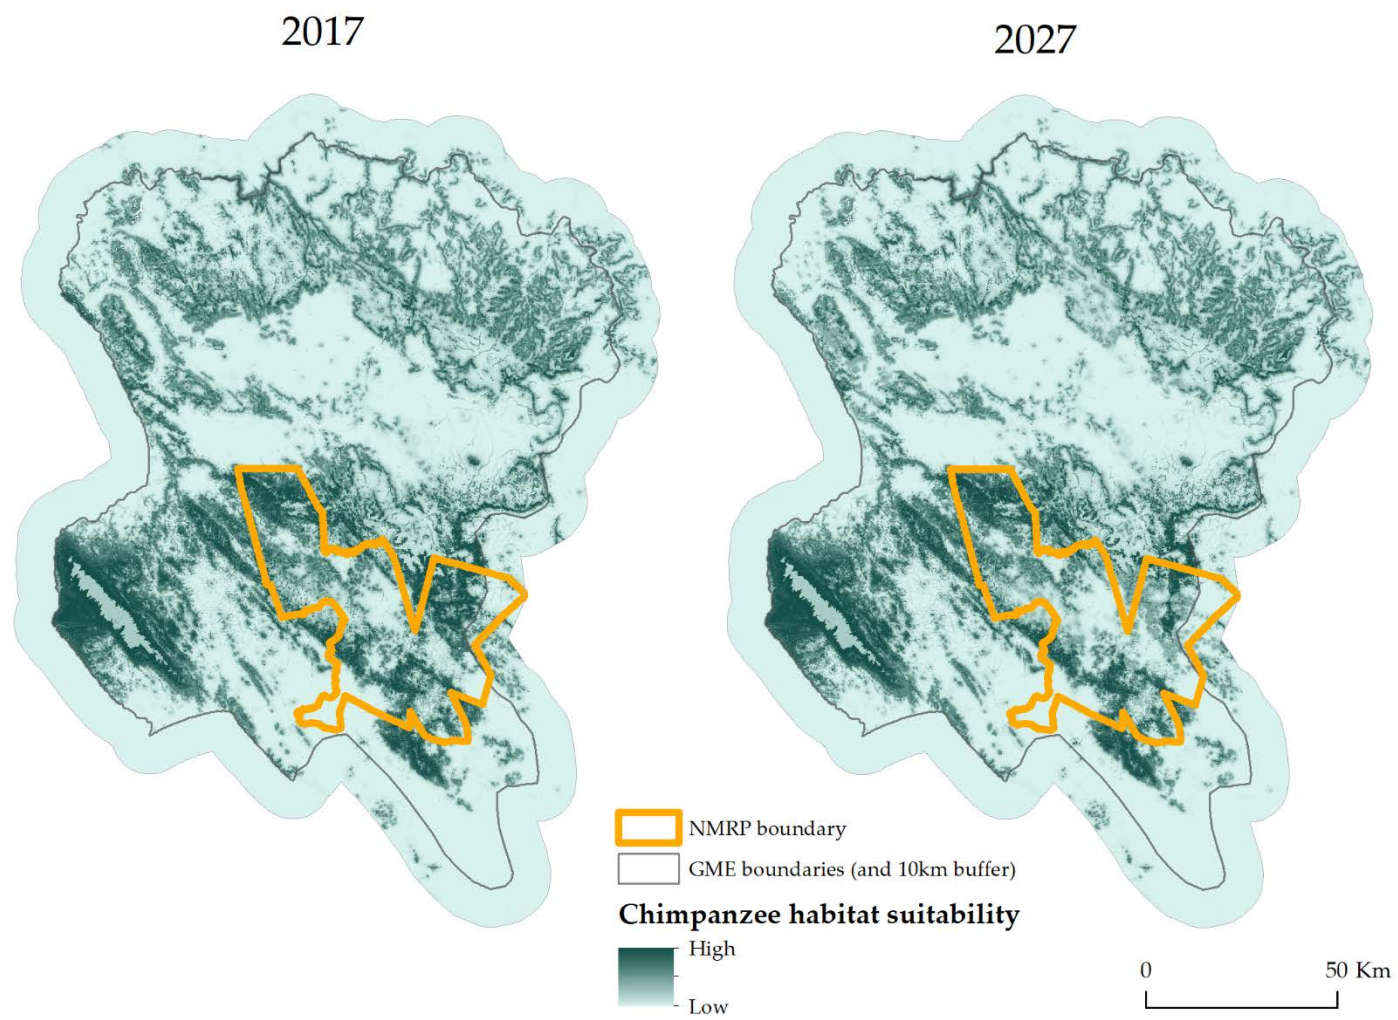

**Figure S3:** Chimpanzee habitat suitability map for 2017 and 2027
